# Supplementary material
Source: publisher figshare collection journal article supplement (https://gsajournals.figshare.com/ndownloader/files/22364184)
Supplement: Supplementary file 1 [file 22364184]

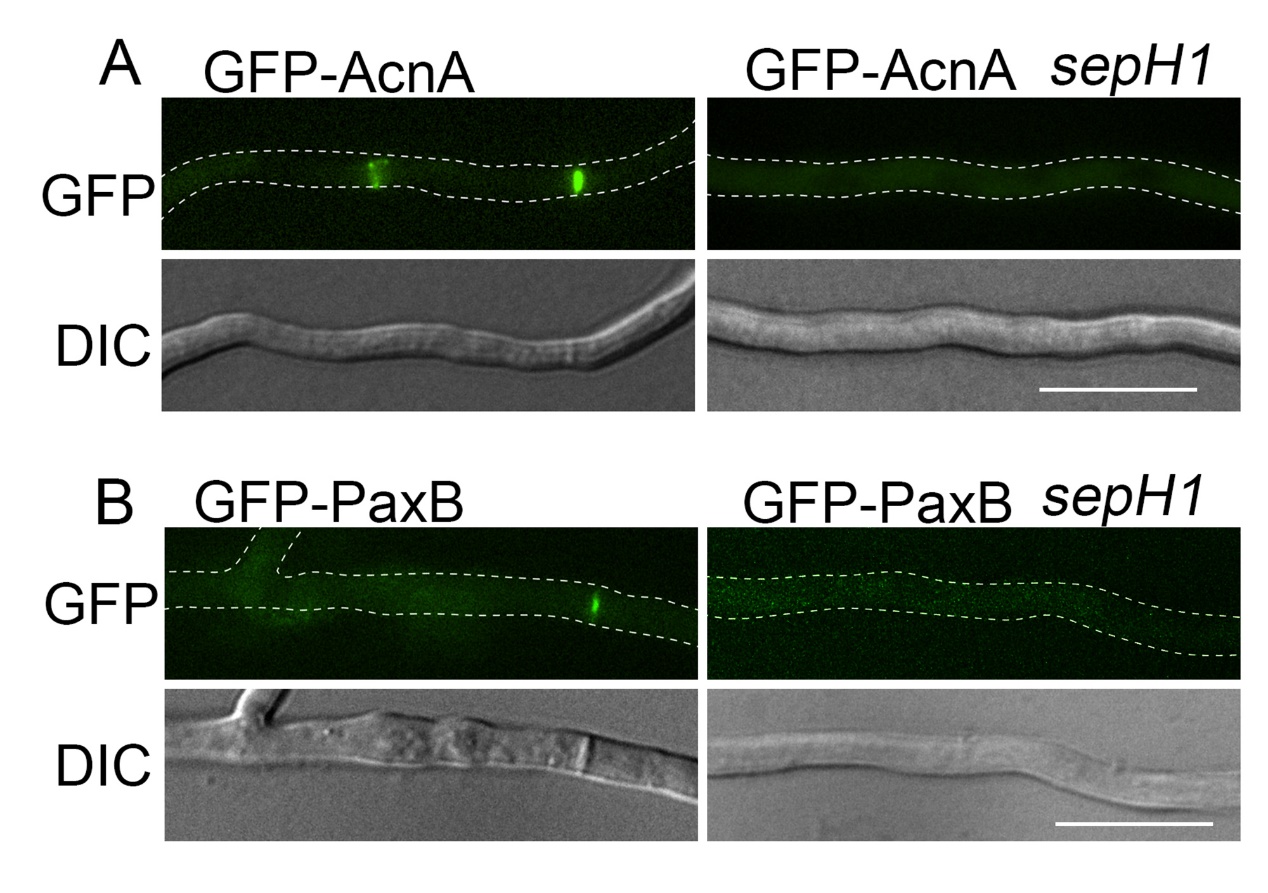


**Figure S4. The SIN was required for the localization of α-actinin and PaxB.** (A) Localization of GFP-α-actinin and (B) GFP-PaxB visualized via differential interference contrast (DIC) in the wild-type (WJ02 and AAV98) and *sepH1* (ZXB11 and ZXB12)strains cultured in the liquid minimal PGR medium at 42°C for 20 h. Bars, 10 µm.
